# Supplementary material for: Stabilization of planar tetra-coordinate silicon in a 2D-layered extended system and design of a high-capacity anode material for Li-ion batteries
Source: Royal Society of Chemistry journal article supplement (doi:10.1039/c8nr03566k), 2018-01-01
Supplement: c8nr03566k1.pdf [file c8nr03566k1.pdf]

## Electronic supplementary information (ESI)

### Stabilization of planar tetracoordinate silicon in the 2D-layered extended system and design of high-capacity anode material for Li-ion batteries

Ming-Jun Sun,<sup>†</sup> Xinrui Cao,<sup>\*,‡</sup> and Zexing Cao<sup>\*,†</sup>

<sup>†</sup> State Key Laboratory of Physical Chemistry of Solid Surfaces and Department of Chemistry, College of Chemistry and Chemical Engineering, Xiamen University, Xiamen 361005, China.

<sup>‡</sup> Department of Physics and Collaborative Innovation Center for Optoelectronic Semiconductors and Efficient Devices, Fujian Provincial Key Laboratory of Theoretical and Computational Chemistry, Xiamen University, Xiamen 361005, China.

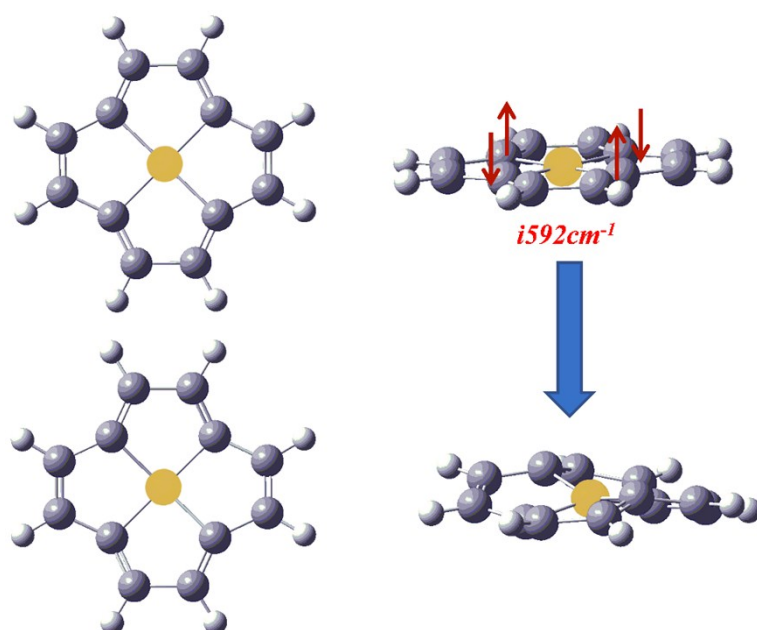

**Fig. S1** The optimized structures of ptSi-C<sub>12</sub>H<sub>8</sub>Si and ttSi-C<sub>12</sub>H<sub>8</sub>Si molecules, as well as the vibrational mode with an imaginary frequency of the ptSi-C<sub>12</sub>H<sub>8</sub>Si molecule.

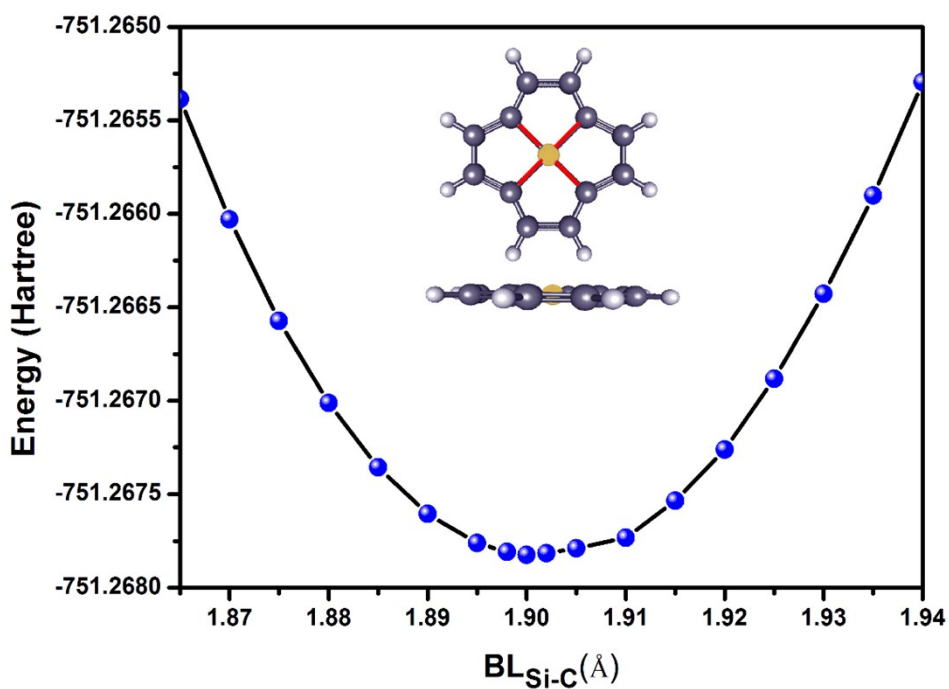

Fig. S2 The energy curve of ptSi-C<sub>12</sub>H<sub>8</sub>Si molecule as a function of the Si-C distance.

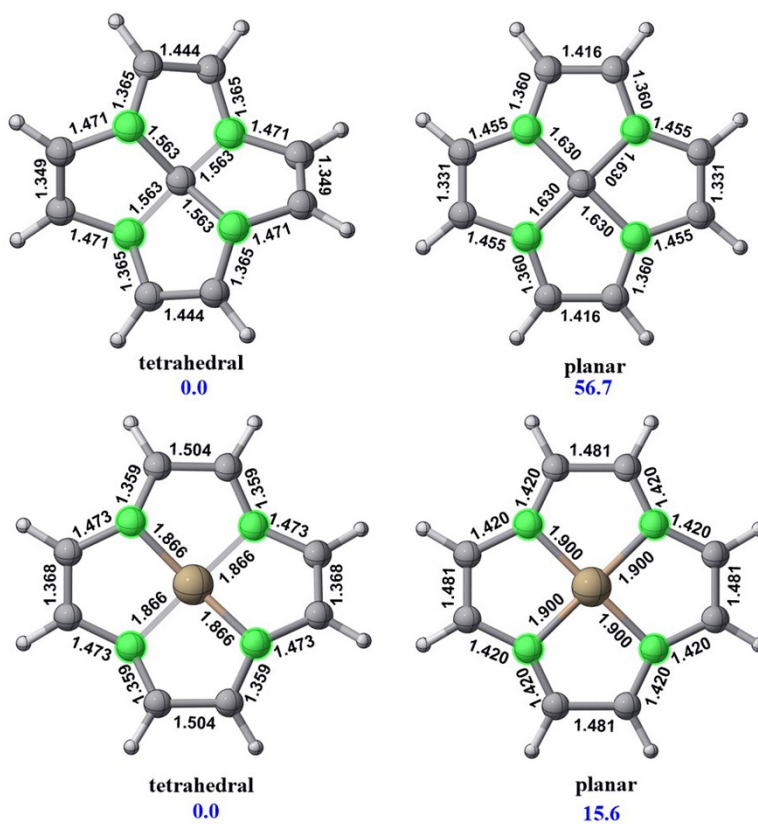

Fig. S3 The energy differences between the planar and twisted tetracoordinate structures for C<sub>13</sub>H<sub>8</sub> and C<sub>12</sub>H<sub>8</sub>Si molecules, in which the green color just refers to the carbon atoms linking to the silicon atom.

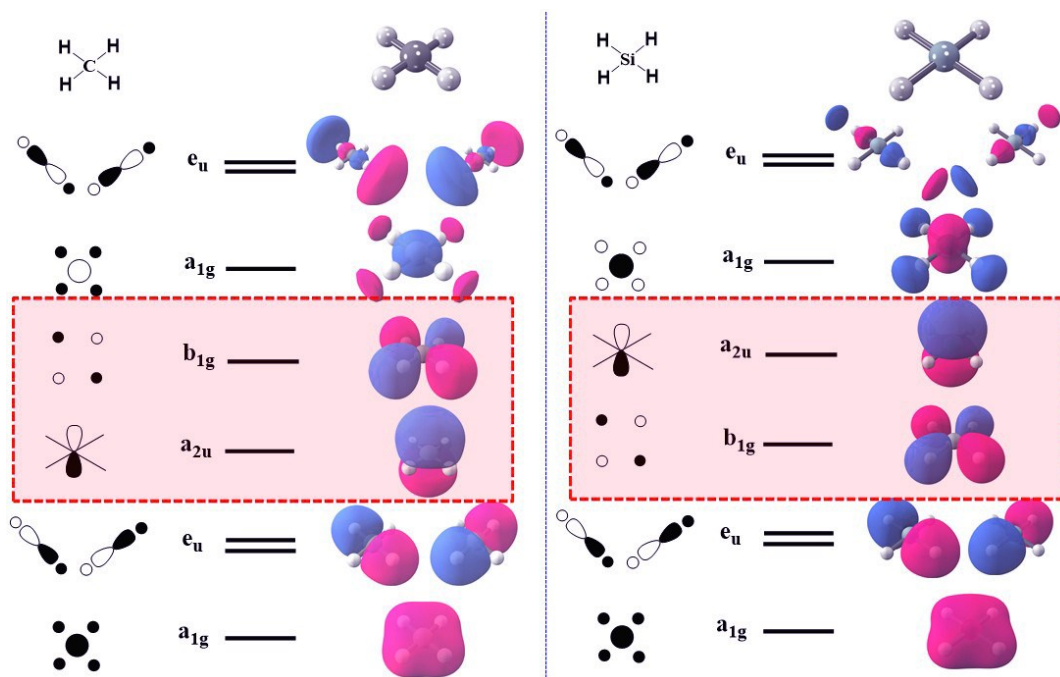

**Fig. S4** Walsh diagrams for selected frontier molecular orbitals of square planar CH<sub>4</sub> and SiH<sub>4</sub> molecules.

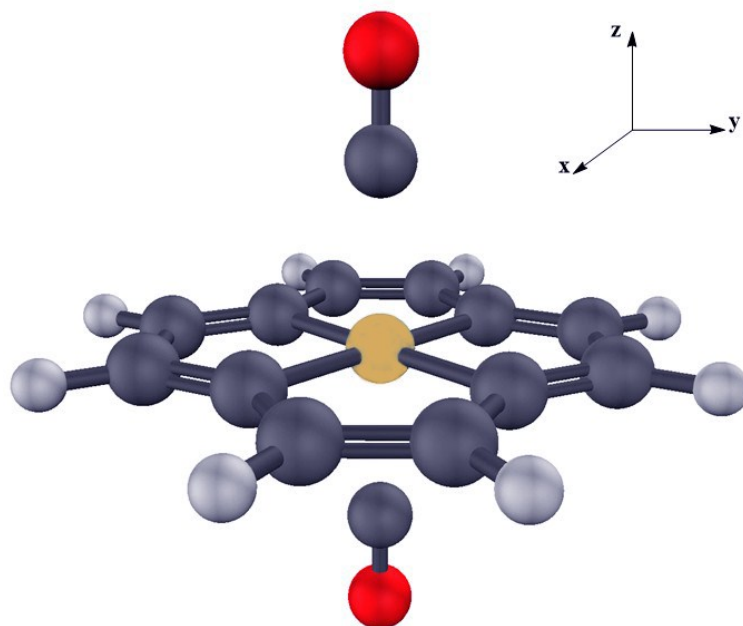

**Fig. S5** The interactions between C<sub>12</sub>H<sub>8</sub>Si molecule and two CO molecules.

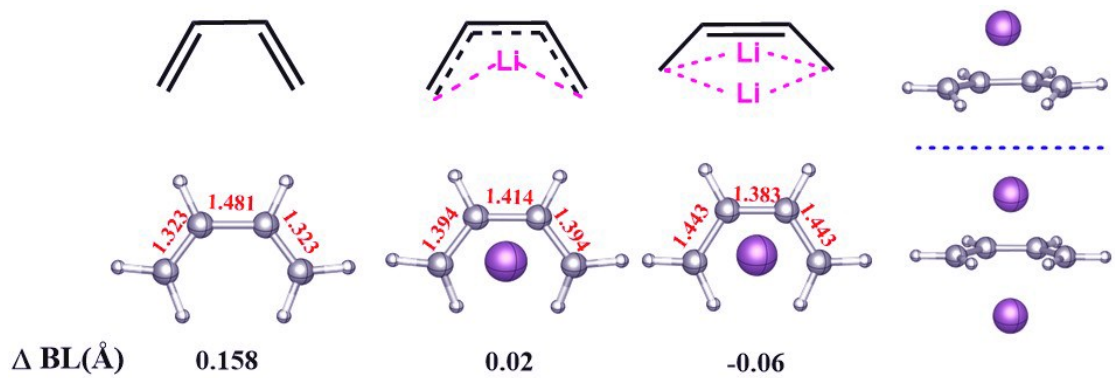

**Fig. S6** The interactions between 1,3-butadiene and lithium atoms and the optimized structures of their complexes.

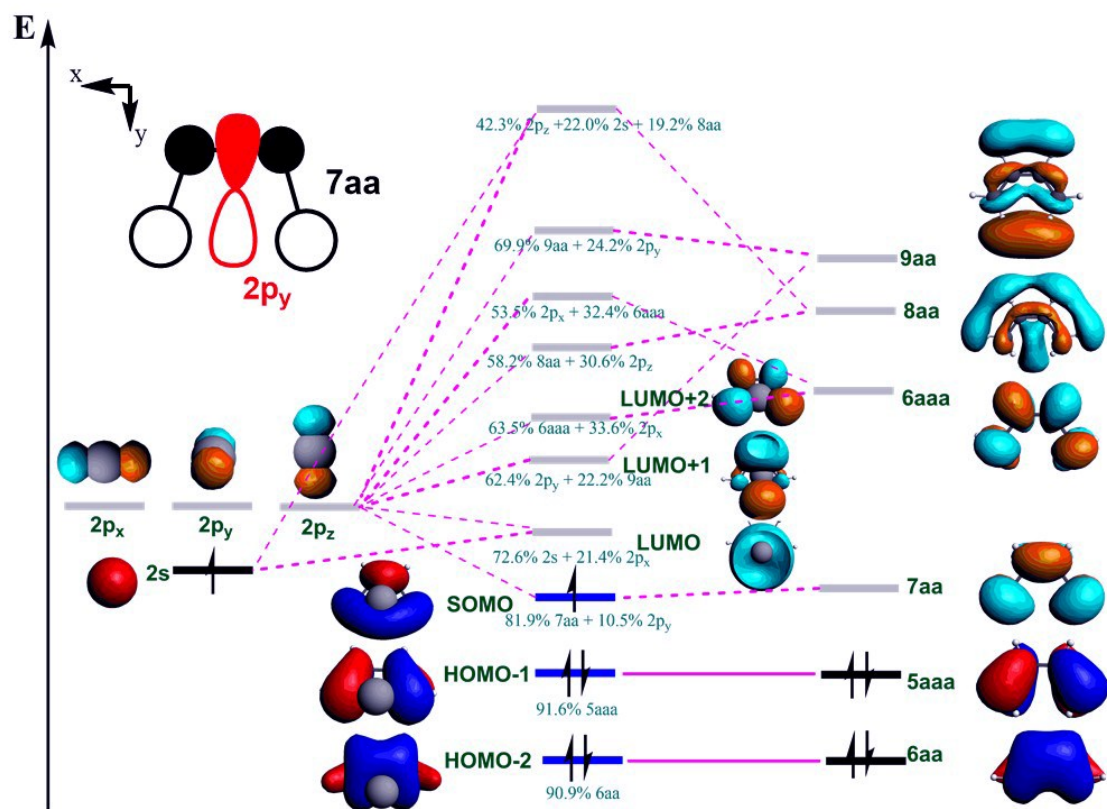

**Fig. S7** The orbital interactions between 1,3-butadiene and lithium atom.

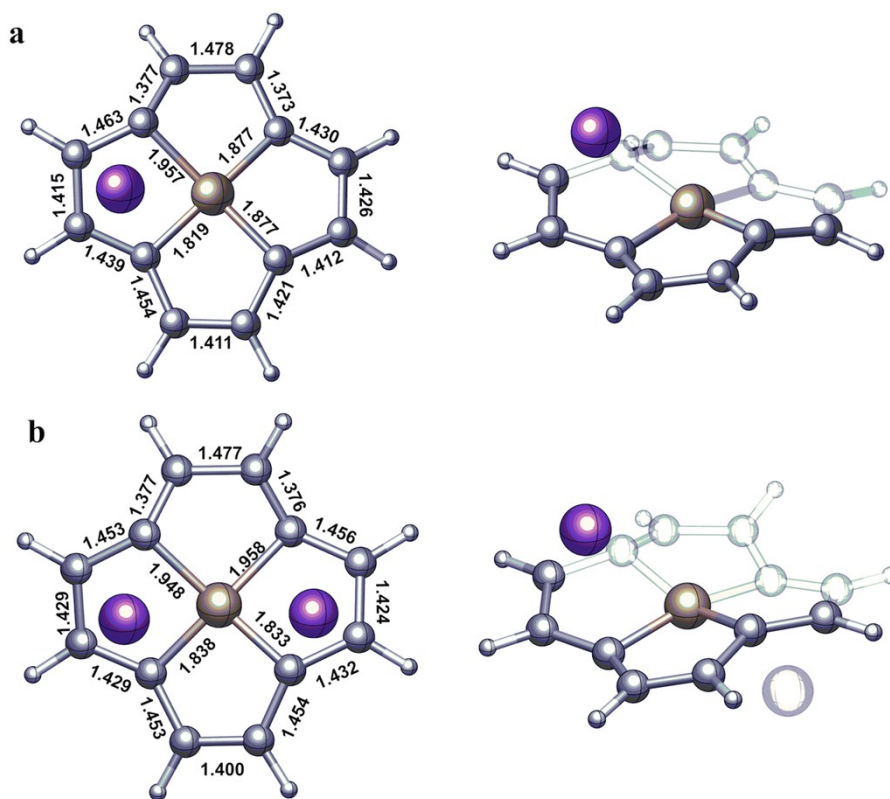

**Fig. S8** The interactions between the  $C_{12}H_8Si$  molecule and lithium. (a) Li. (b) 2Li

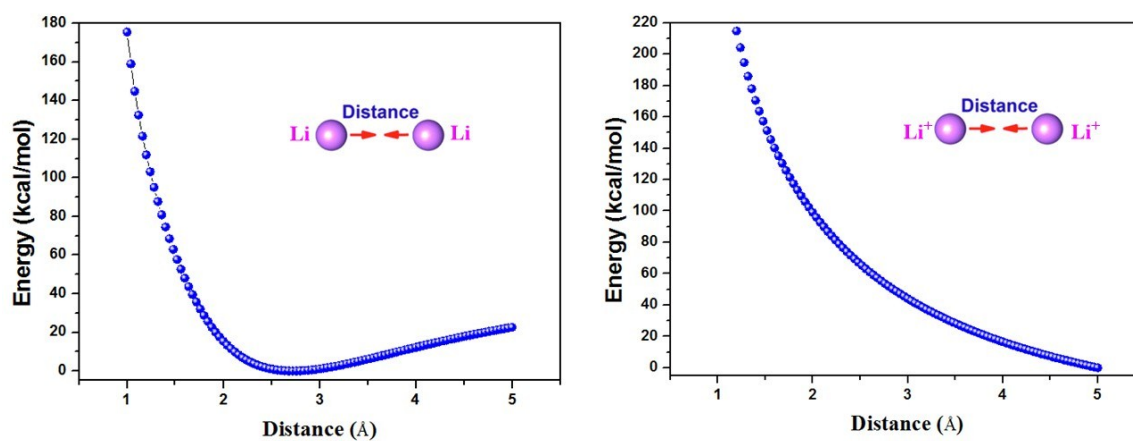

**Fig. S9** The relative energy profiles of  $Li_2$  and  $Li_2^{2+}$  as a function of the Li-Li or the  $Li^+-Li^+$  distance, respectively.

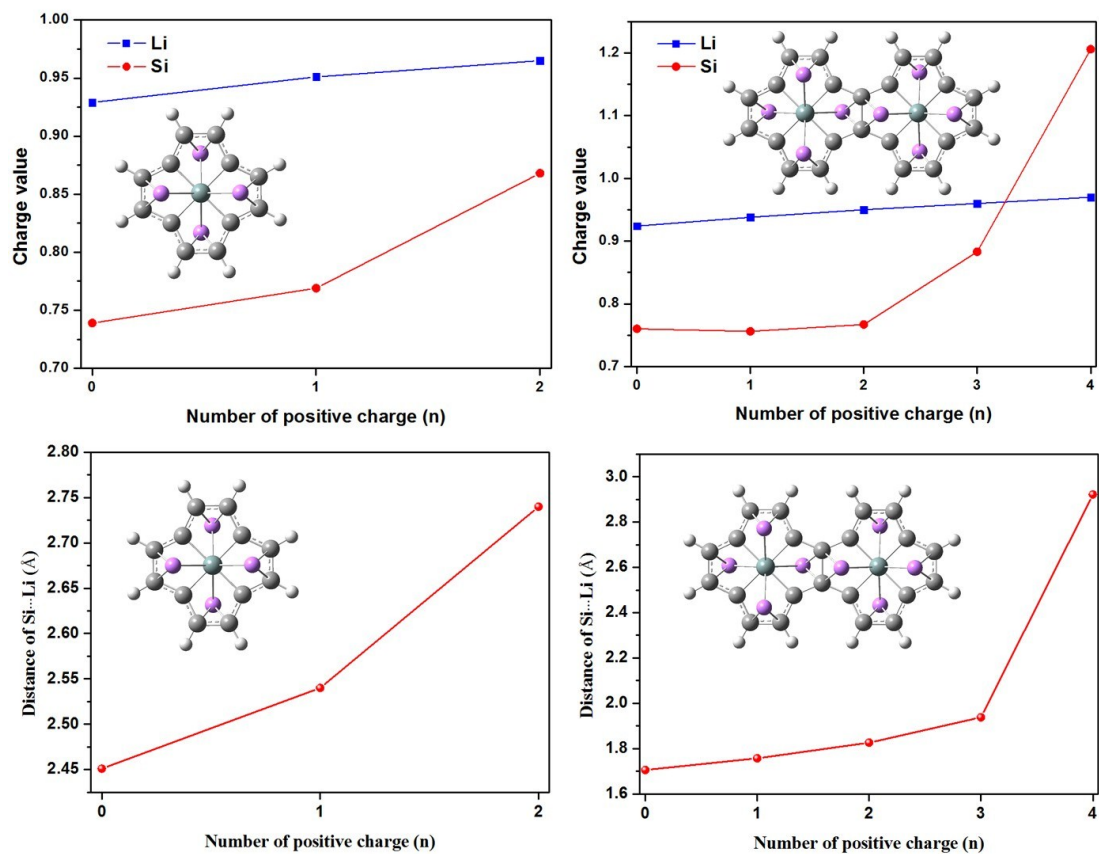

**Fig. 10.** Selected NBO charges and distances of Si...Li as the function of different positive charges in the  $\text{SiC}_{12}\text{H}_8\text{Li}_4$  and  $\text{Si}_2\text{C}_{22}\text{H}_{12}\text{Li}_8$  complexes.

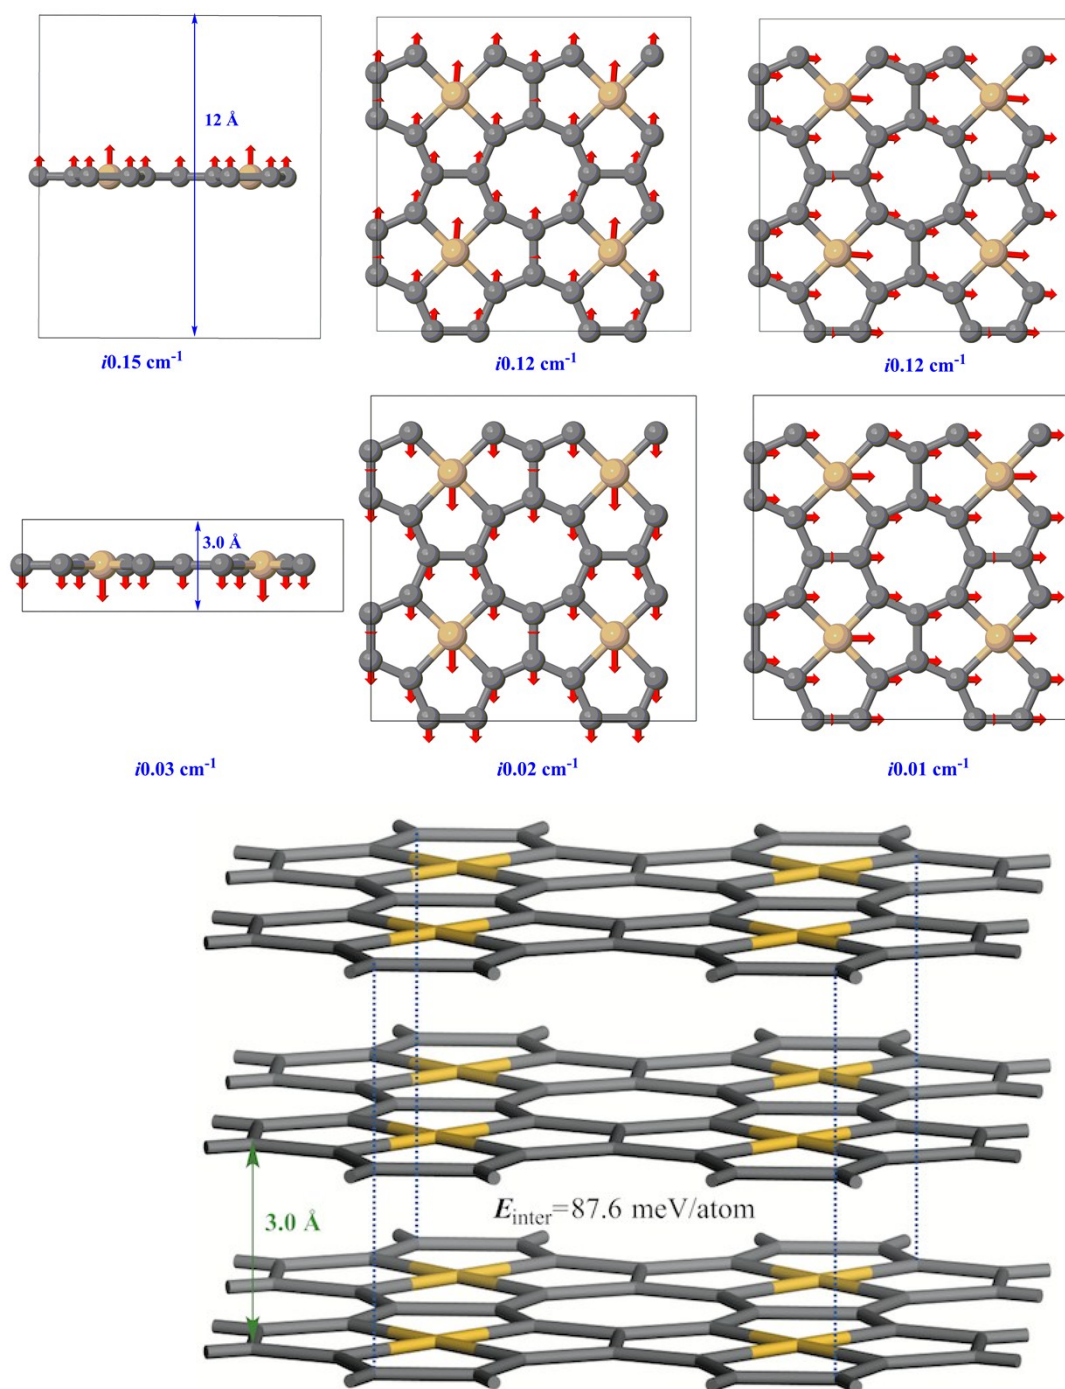

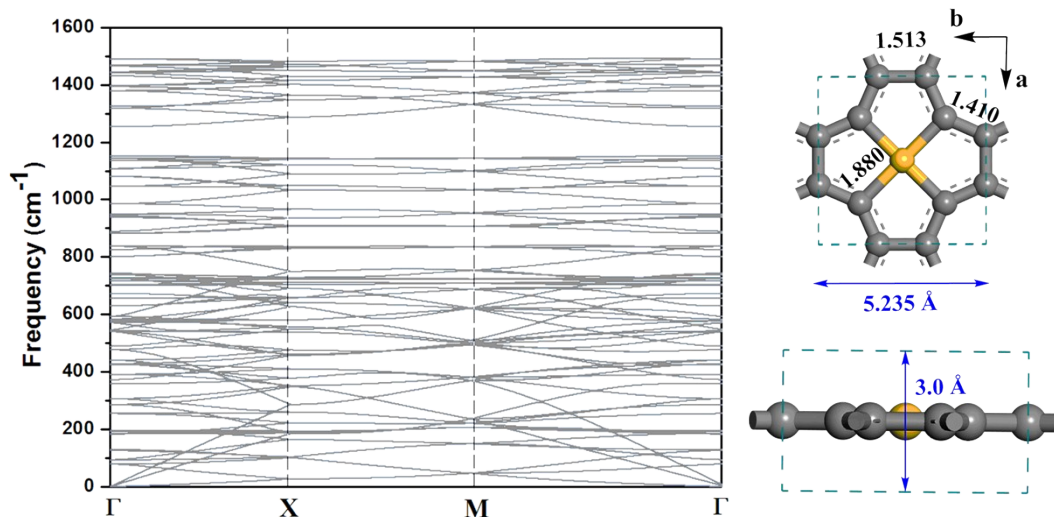

**Fig. S12** Phonon dispersion of the  $\text{SiC}_8$  siligraphite with the layer-by-layer interaction.  $\Gamma(0,0,0)$ ,  $X(0.5,0,0)$ , and  $M(0.5,0.5,0)$  refer to special points in the first Brillouin zone in the reciprocal space.

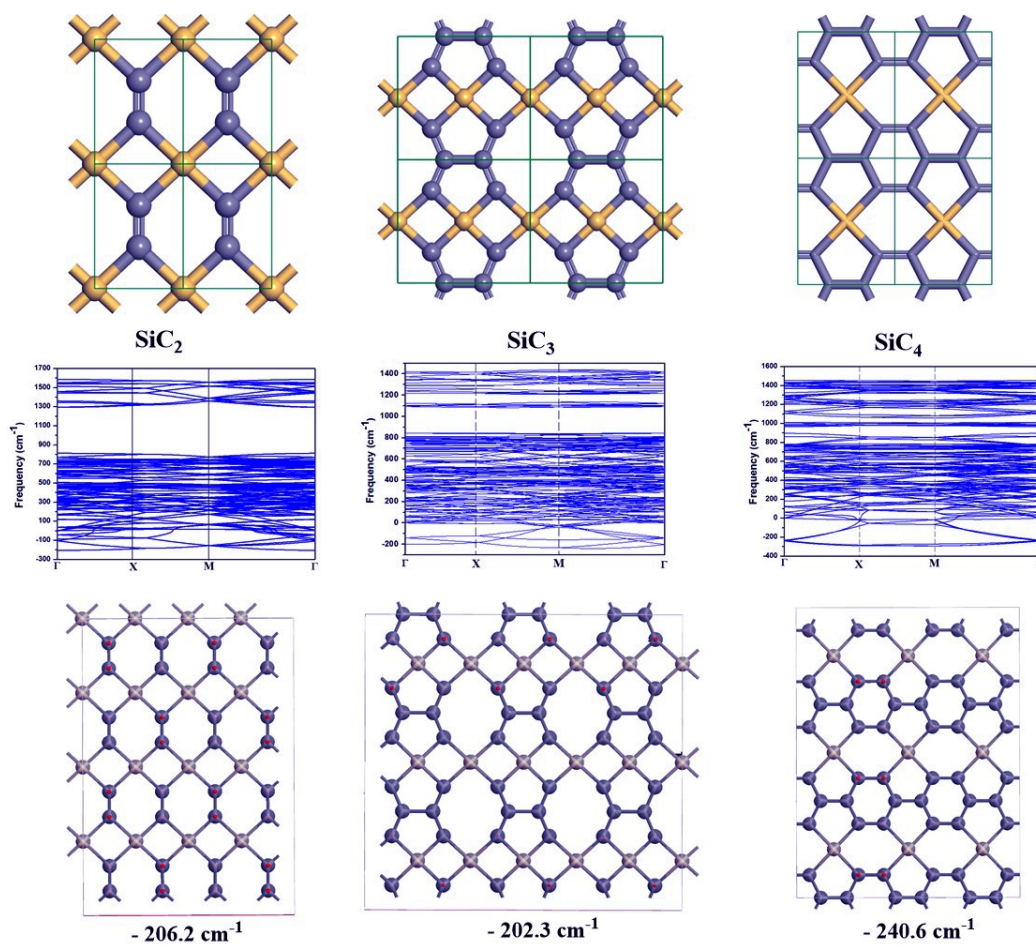

**Fig. S13** Phonon spectra and the vibrational modes with the largest imaginary frequency for the  $\text{SiC}_2$ ,  $\text{SiC}_3$ , and  $\text{SiC}_4$  siligraphenes.



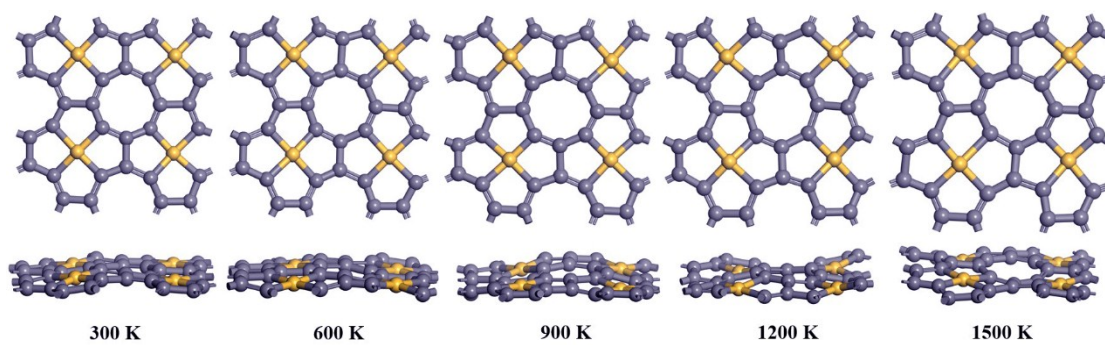

**Fig. S14** Snapshots of the final frame from the 10 ps AIMD simulations at temperatures from 300 to 1500 K (top and side views). Bonds to atoms outside this  $2 \times 2$  section are not shown here.

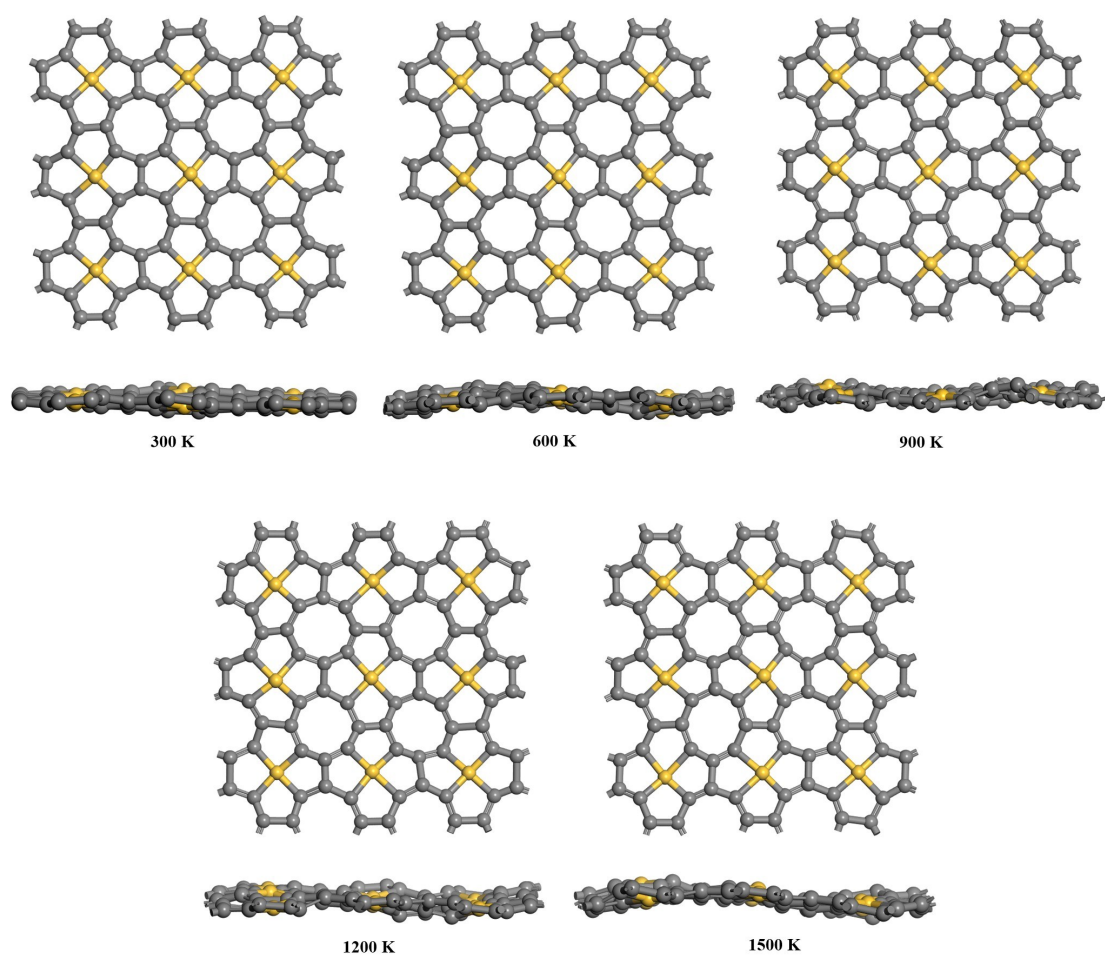

**Fig. S15** Snapshots of the final frame from the 10 ps AIMD simulations at temperatures from 300 to 1500 K (top and side views). Bonds to atoms outside this  $3 \times 3$  section are not shown here.

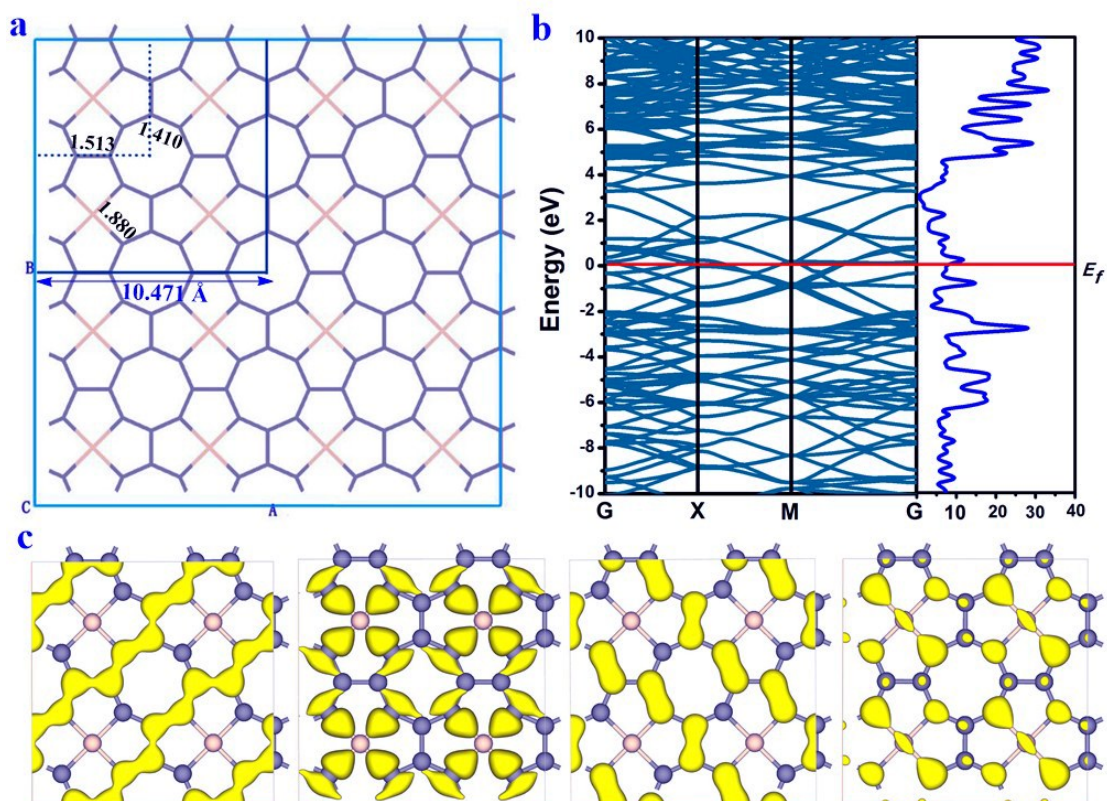

**Fig. S16** (a) The  $2 \times 2$  units of the  $\text{SiC}_8$  siligraphene. (b) Electronic band structure (left) and total density of states (right) of the  $\text{SiC}_8$  siligraphene. (c) The electronic states (HOES-1, HOES, HUES, HUES-1) of the  $\text{SiC}_8$  siligraphene at the X point. The isosurface value is 0.4 e/au.

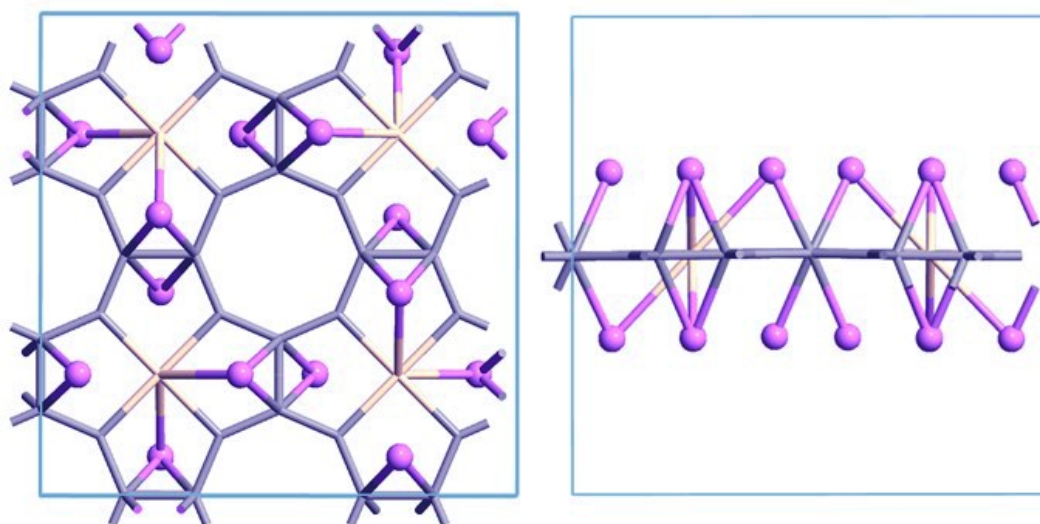

**Fig. S17** The optimized 2D structure of the  $\text{Si}_4\text{C}_{32}\text{Li}_{16}$  complex (Left for the top view and right for the side view).

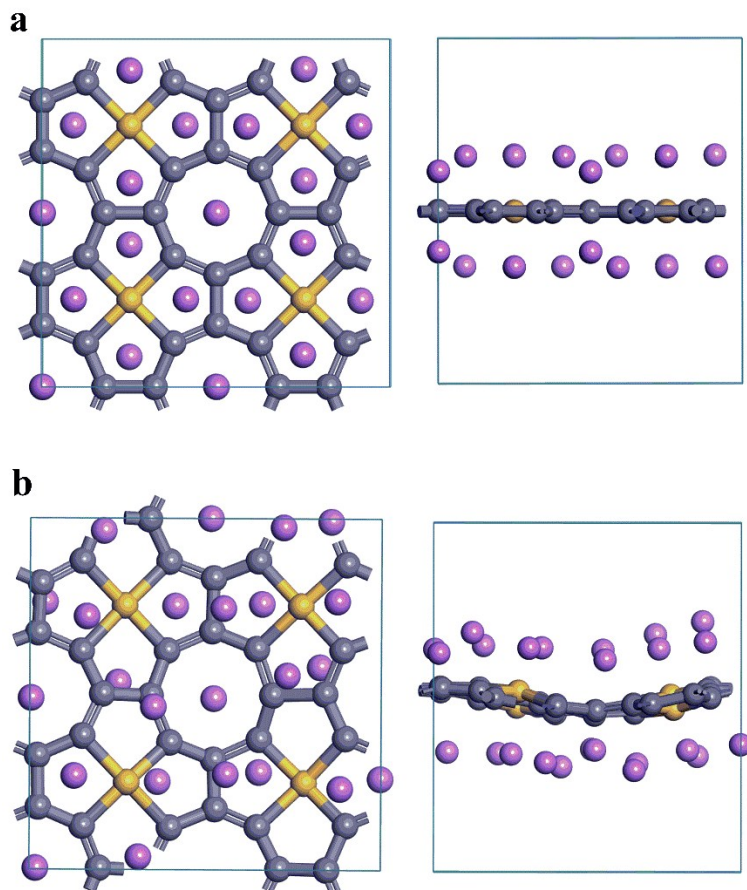

**Fig. S18** **a.** The optimized 2D structure of the  $\text{Si}_4\text{C}_{32}\text{Li}_{24}$  complex. **b.** The last snapshot from the 10 ps AIMD simulations at the temperature of 340 K.

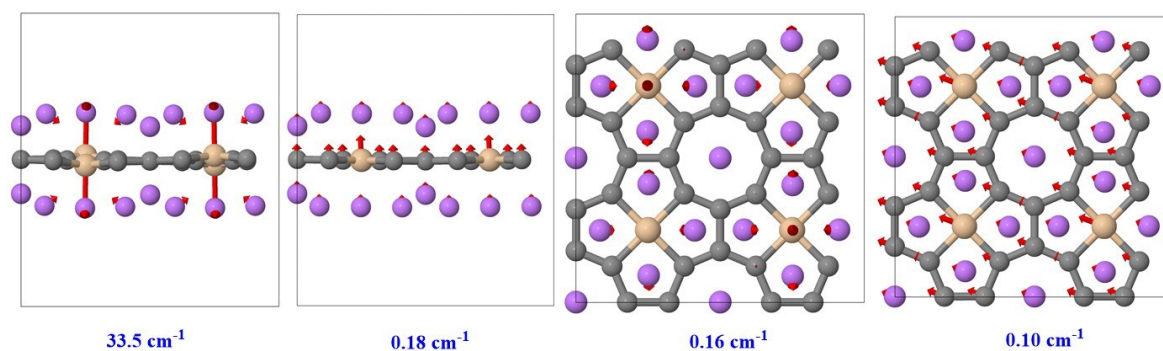

**Fig. S19** The out-of-plane mode with an imaginary frequency and three transitional modes in the  $\text{Si}_4\text{C}_{32}\text{Li}_{24}$  complex.

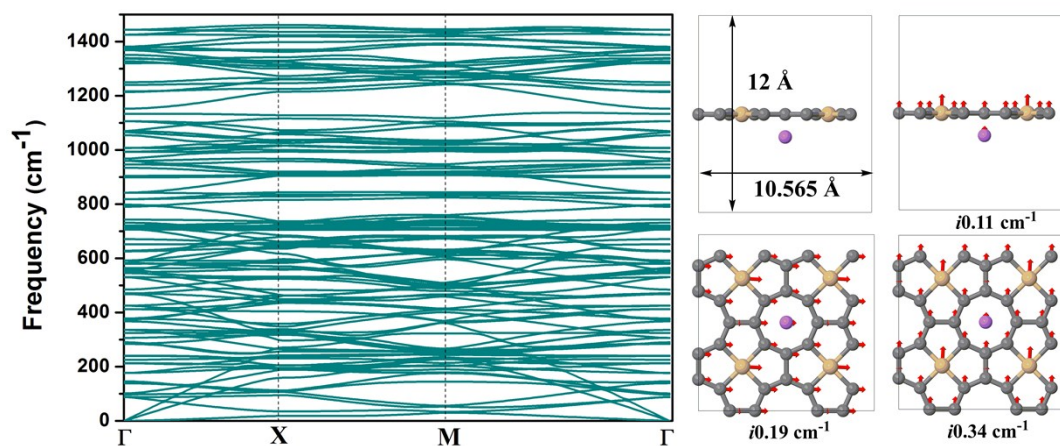

Fig. S20 Phonon spectrum and three transitional modes of the  $\text{Si}_4\text{C}_{32}\text{Li}$  complex.

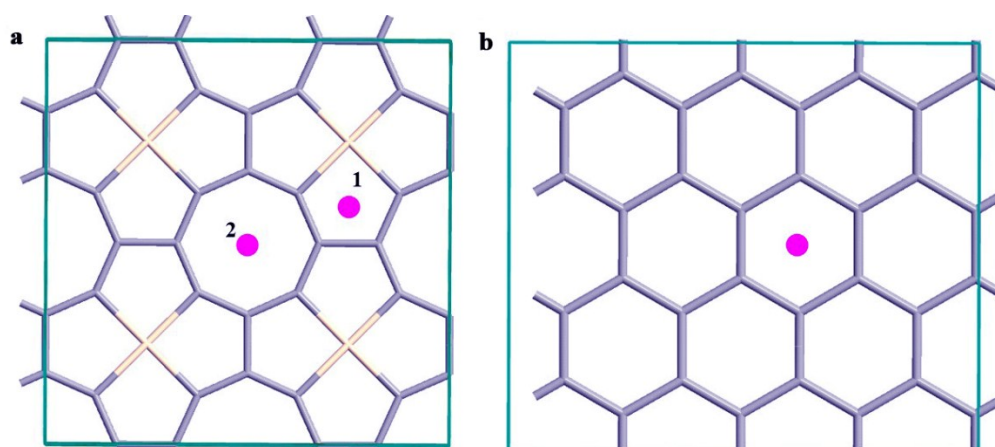

Fig. S21 **a.** The adsorption interaction between lithium and  $\text{SiC}_8$  siligraphene at the most favorable sites **1** and **2**. **b.** The adsorption interaction between lithium and graphene.

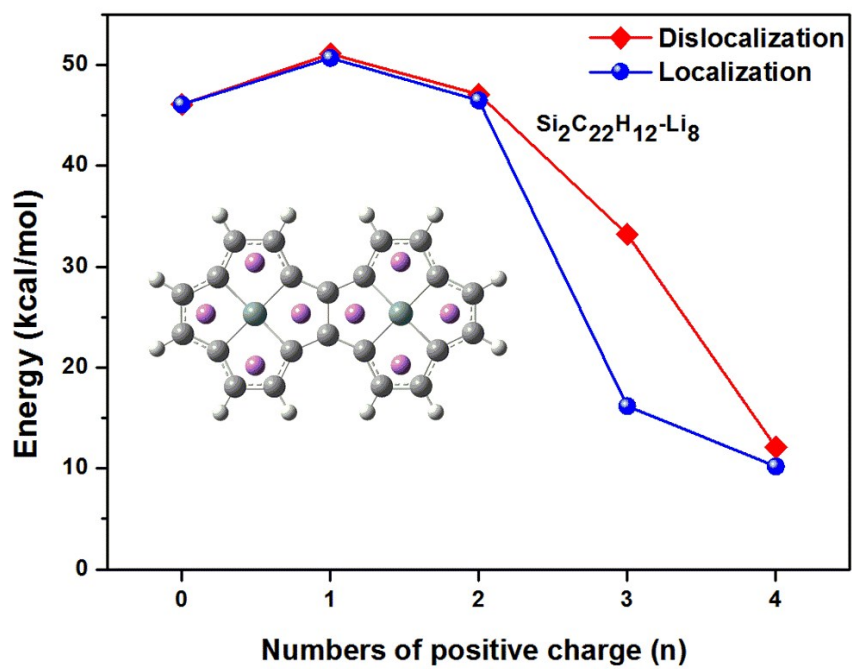

**Fig. S22** The average adsorption energy of of lithium in  $\text{Si}_2\text{C}_{22}\text{H}_{12}\text{Li}_8$  complex with different positive charges.

**Table S1.** The relative energies (kcal/mol) of complexes with different configurations and spin multiplicities.

| <b>C<sub>12</sub>H<sub>8</sub>Si-Li<sub>2</sub></b> |                |                |                 |                 |
|-----------------------------------------------------|----------------|----------------|-----------------|-----------------|
| <b>Spin multiplicity</b>                            | <b>para-ud</b> | <b>para-uu</b> | <b>ortho-ud</b> | <b>ortho-uu</b> |
| <b>S=1</b>                                          | 0.0            | 0.6            | 2.1             | 4.9             |
| <b>S=3</b>                                          | 10.3           | 10.2           | 8.1             | 11.1            |
| <b>C<sub>12</sub>H<sub>8</sub>Si-Li<sub>4</sub></b> |                |                |                 |                 |
| <b>Spin multiplicity</b>                            | <b>udud</b>    | <b>uudd</b>    | <b>uuuu</b>     |                 |
| <b>S=1</b>                                          | 0.0            | 7.4            | 9.5             |                 |
| <b>S=3</b>                                          | 29.2           | 33.6           | 35.4            |                 |
| <b>S=5</b>                                          | 73.2           | 71.5           | 80.3            |                 |

**Table S2.** The interaction energies (kcal/mol) between lithium atom & ion with the C<sub>4</sub>H<sub>6</sub> and C<sub>6</sub>H<sub>6</sub> molecules.

| <b>Complexes</b>                               | <b>Methods</b>        |                       |                          |                     |
|------------------------------------------------|-----------------------|-----------------------|--------------------------|---------------------|
|                                                | <b>B3LYP/6-31G(d)</b> | <b>M062X/6-31G(d)</b> | <b>HSEH1PBE/6-31G(d)</b> | <b>MP2/6-31G(d)</b> |
| C <sub>4</sub> H <sub>6</sub> -Li              | 25.0                  | 28.7                  | 26.9                     | 14.9                |
| C <sub>4</sub> H <sub>6</sub> -Li <sup>+</sup> | 32.9                  | 32.6                  | 32.8                     | 32.7                |
| C <sub>6</sub> H <sub>6</sub> -Li              | 3.7                   | 7.4                   | 5.3                      | 6.3                 |
| C <sub>6</sub> H <sub>6</sub> -Li <sup>+</sup> | 40.6                  | 41.2                  | 41.0                     | 41.7                |

**Table S3.** The calculated average interaction energies (kcal/mol) between lithium and the Si-C clusters and the aromatic system at the B3LYP/6-31G(d) level (The interaction energies for SiC<sub>8</sub> siligraphene and graphene are calculated by the GGA-PBE functional implemented in the VASP package).

| <b>Complexes</b>                                | <b>Lithium atom</b>        | <b>Lithium ion</b>         |
|-------------------------------------------------|----------------------------|----------------------------|
| <b>Silicon carbon clusters</b>                  |                            |                            |
| SiC <sub>12</sub> H <sub>8</sub>                | 37.7                       | 42.5                       |
| Si <sub>2</sub> C <sub>22</sub> H <sub>12</sub> | 41.2                       | 53.2                       |
| Si <sub>4</sub> C <sub>40</sub> H <sub>16</sub> | 54.4                       | <b>52.3 (1) / 60.0 (2)</b> |
| SiC <sub>8</sub> siligraphene                   | <b>48.8 (1) / 59.7 (2)</b> |                            |
| <b>Aromatic systems</b>                         |                            |                            |
| C <sub>6</sub> H <sub>6</sub>                   | 3.7                        | 40.6                       |
| C <sub>24</sub> H <sub>12</sub>                 | 5.8                        | 45.8                       |
| C <sub>54</sub> H <sub>18</sub>                 | 13.2                       | 50.2                       |
| graphene                                        | <b>0.1</b>                 |                            |
